# Supplementary material
Source: PubMed Central journal article supplement (PMC3256915)
Supplement: supp_M111.278705_jbc.M111.278705-1.pdf [file supp_M111.278705_jbc.M111.278705-1.pdf]

## Supplemental Experimental Procedures:

### Primer sequences used for qRT-PCR:

PSA:            5'-GCCCTGCCCGAAAGG  
                  3'-GATCCACTTCCGGTAATGCA

NKX3.1:        5'-CCGAGACGCTGGCAGAGACC  
                  3'-GCTTAGGGGTTTGGGAAG

AR:            5'-CCTGGCTTCCGCAACTTACAC  
                  3'-GGACTTGTGCATGCGGTACTCA

Lin28B:        5'-AGCCCCTTGGATATTCCAGTC  
                  3'-AATGTGAATTCCACTGGTTCTCCT

c-Myc: 5'-TGAGGAGACACCGCCCAC  
                  3'-CAACATCGATTTCTTCCTCAT C

### Primers used for ChIP assays:

PSA promoter-AR binding site:

ARE-III-5' -CATGTTACATTAGTACACCTTGCC  
ARE-III-3' -TCTCAGATCCAGGCTTGCTTACTGTC

NKX3.1 promoter-AR binding site:

ARE-I-5' -TTGCATAAATTAGGGGAGAACATACCA  
ARE-I-3' -GAGGGACCCAGCTGCGATTCA

AR promoter-Myc binding site:

5'-GAGGGTTCCTAGAGCAAATGG  
3'-CAGATGGGAGAGTGGGAGAG

### Supplemental Figure Legends

**Figure 1. A & B** ) Expression levels of let-7c in LNCaP and LN-IL6+ cells transfected with let-7c anti-sense oligos and let-7c plasmids respectively. **C**) Expression of let-7c in C4-2B cells stably expressing let-7c.

**Figure 2. A & B)** Protein levels of Myc and AR were analyzed by Western blotting in LNCaP and C4-2B cells stably expressing let-7c. Levels of both AR and Myc were lower in the presence of let-7c.

**Figure 3.** LNCaP (**A**) and C4-2B (**B**) cells stably expressing GFP or let-7c were transfected with Myc and pGL4-AR-prom-Luc reporter. AR promoter activity was reduced in cells expressing let-7c while overexpression of Myc could overcome the decrease in AR promoter activity induced by let-7c.

**Figure 4. A)** Schematic diagram shows the conserved binding sites for let-7c in the 3'-UTR of Myc. **B)** Table shows the conservation of let-7c binding sites in the 3'-UTR of Myc among several vertebrates and the predicted free energies of the resulting hybrids.

**Figure S1**

**A**

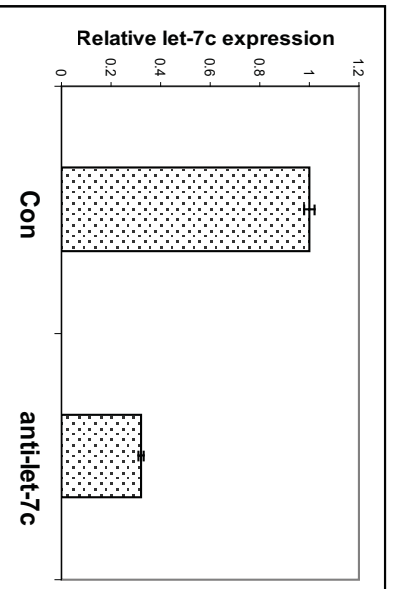

**B**

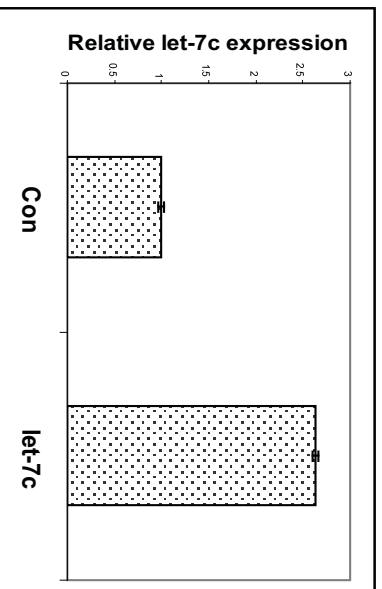

**C**

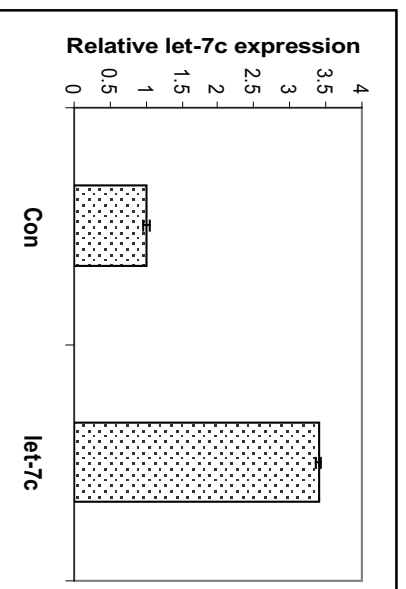

Figure S2

A

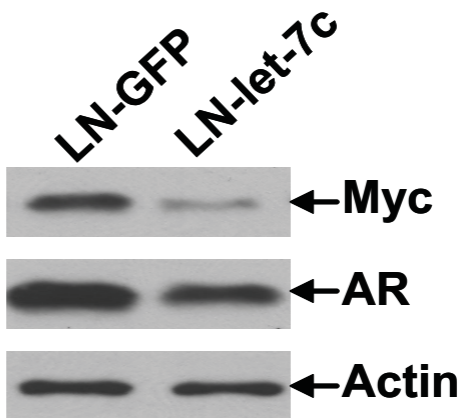

B

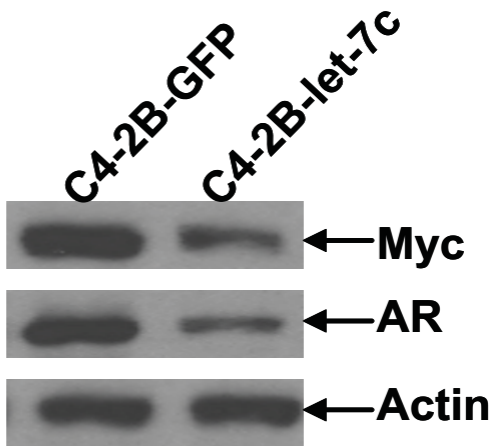

Figure S3

A

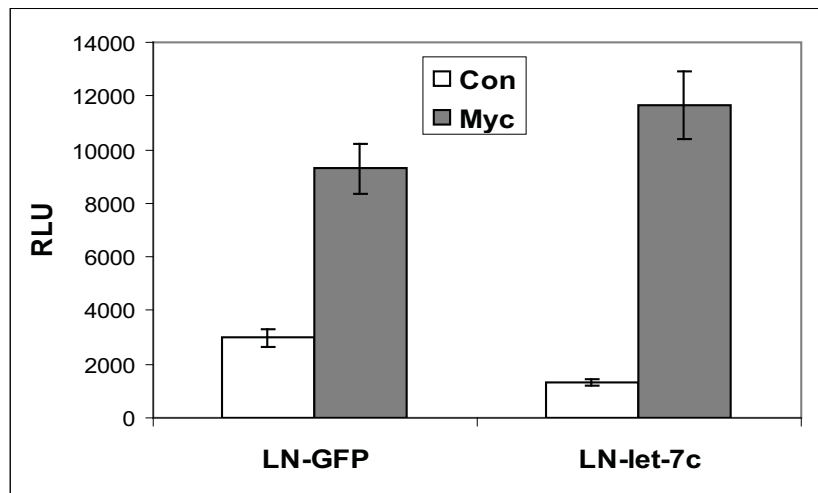

B

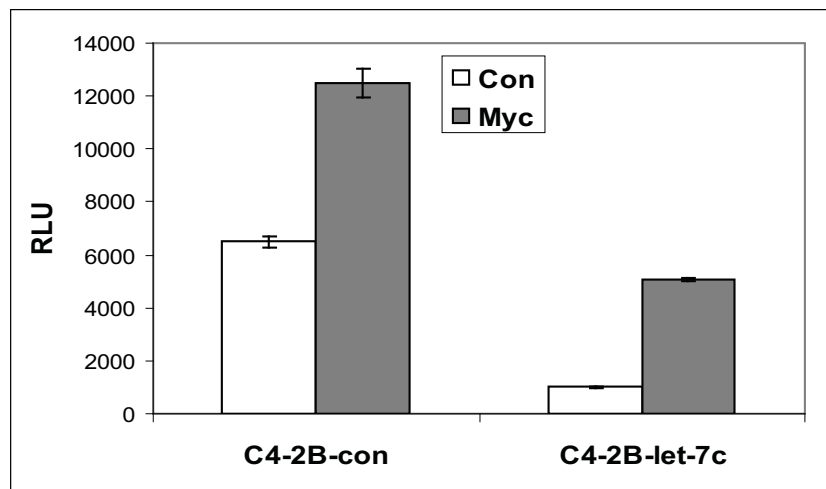

A

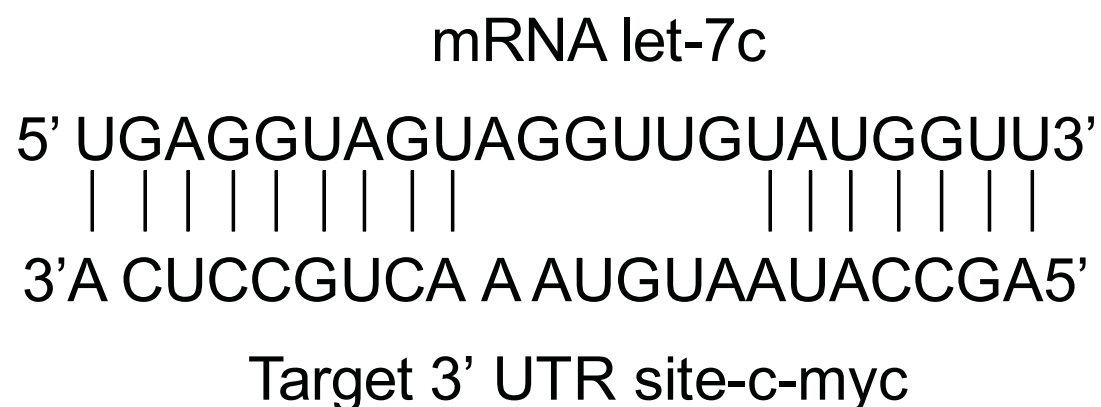

B

| Org | PicTar score | PicTar score per species | microRNA                   | Probabilities | Nuclei mapped to sequence | Free Energies kcal/mol | Structure of predicted duplex                                                                                                                                                |
|-----|--------------|--------------------------|----------------------------|---------------|---------------------------|------------------------|------------------------------------------------------------------------------------------------------------------------------------------------------------------------------|
| hs  | 7.13         | 6.98                     | <a href="#">hsa-let-7c</a> | 0.97<br>0.97  | 506 870                   | -20.9<br>-21.5         | <u>UCAUAC ACU</u> <u>UACCUCA</u> : <u>GGUAUG</u> <u>UGG</u> <u>AUGGAGU</u><br><u>AUC UAUAGC CU</u> <u>UACCUCA</u> : <u>UGG AUGUUG GA</u> <u>AUGGAGU</u>                      |
| pt  | 7.13         | 7.08                     | <a href="#">hsa-let-7c</a> | 0.97<br>0.97  | 491 855                   | -20.9<br>-21.5         | <u>UCAUAC</u> <u>ACU</u> <u>UACCUCA</u> : <u>GGUAUG</u> <u>UGG</u> <u>AUGGAGU</u><br><u>AUC UAUAGC CU</u> <u>UACCUCA</u> : <u>UGG AUGUUG GA</u> <u>AUGGAGU</u>               |
| mm  | 7.13         | 7.30                     | <a href="#">hsa-let-7c</a> | 0.97<br>0.97  | 481 852                   | -19.7<br>-22.1         | <u>ACC</u> <u>GUAC</u> <u>U</u> <u>UACCUCA</u> : <u>UGG</u> <u>UAUG</u> <u>G</u> <u>AUGGAGU</u><br><u>ACC UA AGC CU</u> <u>UACCUCA</u> : <u>UGG AU UUG GA</u> <u>AUGGAGU</u> |
| rn  | 7.13         | 7.37                     | <a href="#">hsa-let-7c</a> | 0.97<br>0.97  | 486 865                   | -19.7<br>-22.1         | <u>ACC</u> <u>GUAC</u> <u>U</u> <u>UACCUCA</u> : <u>UGG</u> <u>UAUG</u> <u>G</u> <u>AUGGAGU</u><br><u>ACC UA AGC CU</u> <u>UACCUCA</u> : <u>UGG AU UUG GA</u> <u>AUGGAGU</u> |
| cf  | 7.13         | 7.03                     | <a href="#">hsa-let-7c</a> | 0.97<br>0.97  | 476 840                   | -22.1<br>-21.5         | <u>UCAUAC</u> <u>ACU</u> <u>UACCUCA</u> : <u>GGUAUG</u> <u>UGG</u> <u>AUGGAGU</u><br><u>AUC UAUAGC CU</u> <u>UACCUCA</u> : <u>UGG AUGUUG GA</u> <u>AUGGAGU</u>               |
| gg  | 7.13         | 8.28                     | <a href="#">hsa-let-7c</a> | 0.98<br>0.98  | 271 632                   | -22.1<br>-20.5         | <u>UCAUAC</u> <u>ACU</u> <u>UACCUCA</u> : <u>GGUAUG</u> <u>UGG</u> <u>AUGGAGU</u><br><u>UC UAUAGC CU</u> <u>UACCUCA</u> : <u>GG AUGUUG GA</u> <u>AUGGAGU</u>                 |
| fr  | 7.13         | 3.23                     | <a href="#">hsa-let-7c</a> | 0.96          | 592                       | -21.2                  | <u>AAC CAUA</u> <u>ACUU</u> <u>UACCUCA</u> : <u>UUG</u> <u>GUAU</u> <u>UGGA</u> <u>AUGGAGU</u>                                                                               |
